# Supplementary material for: Chemical engineering of mixed halide hexaborates as nonlinear optical materials
Source: Royal Society of Chemistry journal article supplement (doi:10.1039/c6ra21584j), 2016-01-01
Supplement: c6ra21584j1.pdf [file c6ra21584j1.pdf]

## Supporting information

# Chemical engineering of mixed halide hexaborates as nonlinear optical materials

*Mingjun Xia,<sup>†</sup> Zhanyu Hou,<sup>†,‡</sup> Yi Yang,<sup>†,‡</sup> Bo Xu,<sup>†,‡</sup> Lijuan Liu,<sup>†</sup> Xiaoyang Wang,<sup>†</sup>*

*Zheshuai Lin,<sup>†</sup> R. K. Li<sup>\*†</sup> and Chuangtian Chen<sup>†</sup>*

<sup>†</sup>Beijing Center for Crystal Research and Development, Key Laboratory of Functional Crystals and Laser Technology, Technical Institute of Physics and Chemistry, Chinese Academy of Sciences, Beijing 100190, China.

<sup>‡</sup>University of Chinese Academy of Sciences, Beijing 100049, China.

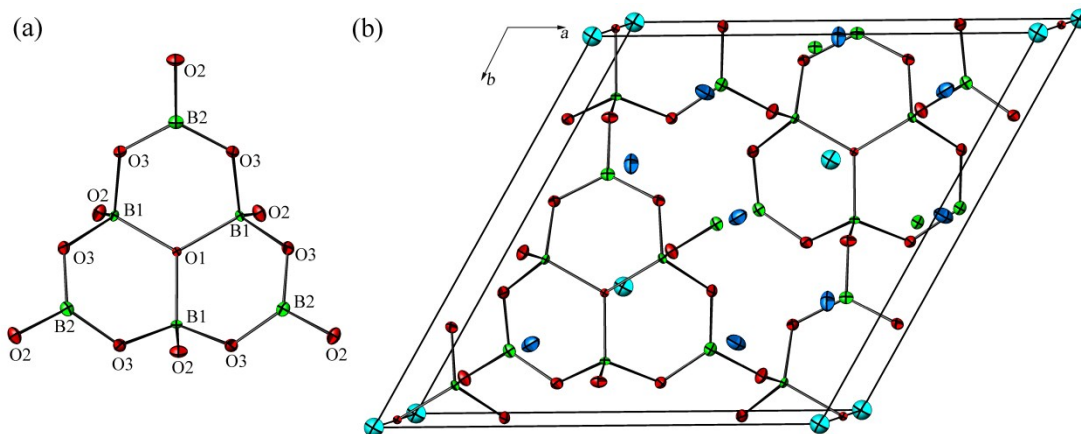

Figure S1. (a) The B<sub>6</sub>O<sub>13</sub> group and (b) crystal structure of K<sub>3</sub>B<sub>6</sub>O<sub>10</sub>Br<sub>0.53</sub>Cl<sub>0.47</sub> viewed along *c* direction. The displacement ellipsoids are drawn at the 50% probability level. (blue, K; cyan, Br/Cl; green, B; red, O).

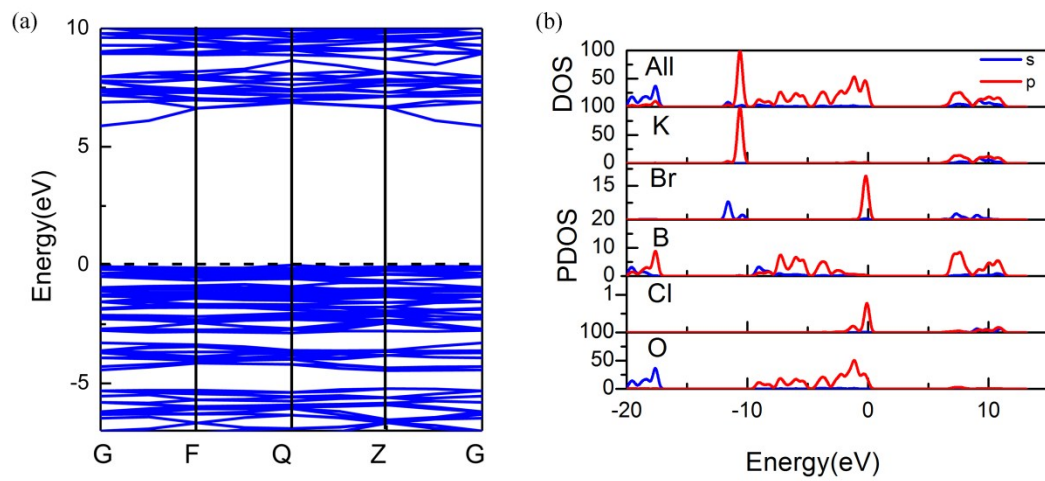

Figure S2. (a) Electronic band structure and (b) density of state (DOS) and partial density of state (PDOS) of  $K_3B_6O_{10}Br_{0.53}Cl_{0.47}$ .

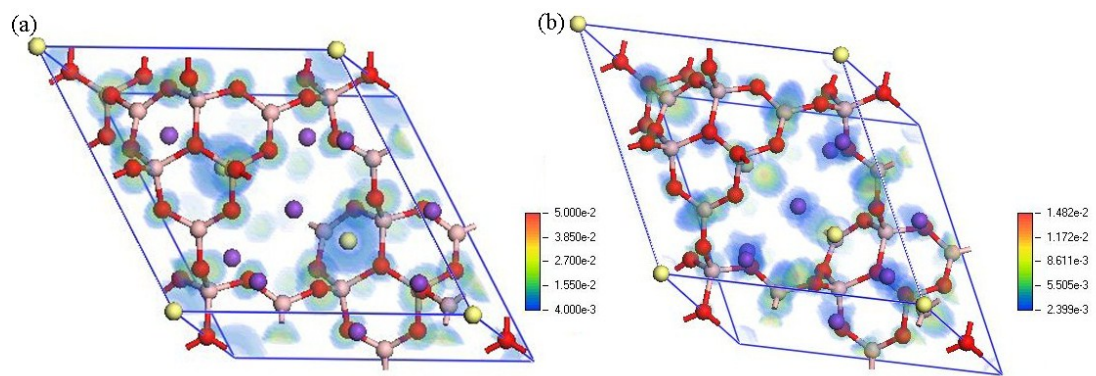

Figure S3. (a) Virtual-electron occupied and (b) unoccupied SHG density of  $K_3B_6O_{10}Br$ .

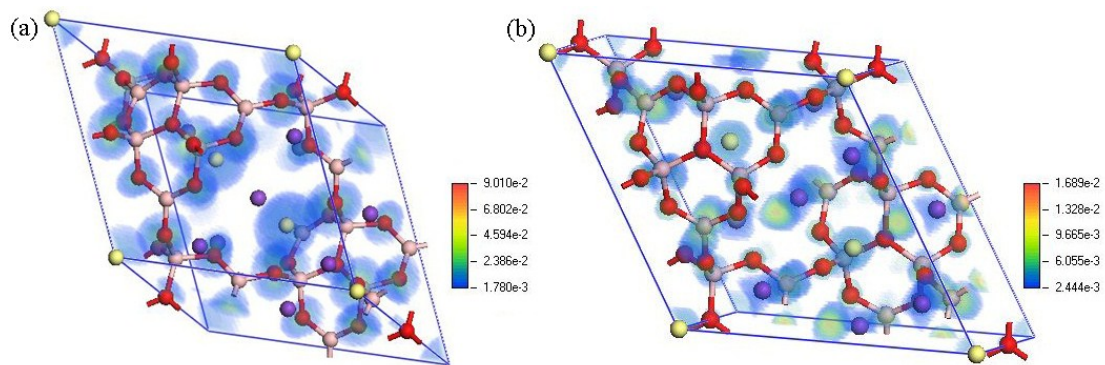

Figure S4. (a) Virtual-electron occupied and (b) unoccupied SHG density of  $K_3B_6O_{10}Cl$ .

Table S1. Atomic coordinates and equivalent isotropic displacement parameters ( $\text{\AA}^2$ ) for  $\text{K}_3\text{B}_6\text{O}_{10}\text{Br}_{0.79}\text{Cl}_{0.21}$ .  $U_{\text{eq}}$  is defined as one third of the trace of the orthogonalized  $U_{ij}$  tensor.

| Atom | x           | y           | z           | S.O.F    | $U_{\text{eq}}$ |
|------|-------------|-------------|-------------|----------|-----------------|
| Br1  | 0           | 0           | 0.00517(6)  | 0.792(7) | 0.0218(2)       |
| Cl1  | 0           | 0           | 0.00517(6)  | 0.208(7) | 0.0218(2)       |
| K1   | 0.81995(4)  | 0.63990(7)  | 0.11866(7)  | 1        | 0.0168(2)       |
| O1   | 0           | 0           | 0.4506(4)   | 1        | 0.0054(7)       |
| O2   | 0.55530(10) | 0.44470(10) | -0.0539(2)  | 1        | 0.0113(4)       |
| O3   | 0.76660(15) | 0.76608(15) | 0.37773(16) | 1        | 0.0110(3)       |
| B1   | 0.91278(16) | 0.8256(3)   | 0.4564(3)   | 1        | 0.0064(5)       |
| B2   | 0.6996(3)   | 0.84981(15) | 0.3411(4)   | 1        | 0.0085(6)       |

Table S2. Atomic coordinates and equivalent isotropic displacement parameters ( $\text{\AA}^2$ ) for  $\text{K}_3\text{B}_6\text{O}_{10}\text{Br}_{0.65}\text{Cl}_{0.35}$ .  $U_{\text{eq}}$  is defined as one third of the trace of the orthogonalized  $U_{ij}$  tensor.

| Atom | x           | y           | z           | S.O.F    | $U_{\text{eq}}$ |
|------|-------------|-------------|-------------|----------|-----------------|
| Br1  | 0           | 0           | 0.99481(8)  | 0.651(5) | 0.0222(3)       |
| Cl1  | 0           | 0           | 0.99481(8)  | 0.349(5) | 0.0222(3)       |
| K1   | 0.17982(4)  | 0.35964(8)  | 0.88081(7)  | 1        | 0.0170(3)       |
| O1   | 0           | 0           | 0.5491(5)   | 1        | 0.0051(8)       |
| O2   | 0.44468(11) | 0.55532(11) | 1.0538(2)   | 1        | 0.0104(5)       |
| O3   | 0.23332(17) | 0.23384(16) | 0.62221(18) | 1        | 0.0103(4)       |
| B1   | 0.08719(18) | 0.1744(4)   | 0.5429(3)   | 1        | 0.0061(6)       |
| B2   | 0.3000(4)   | 0.15002(18) | 0.6581(4)   | 1        | 0.0080(7)       |

Table S3. Atomic coordinates and equivalent isotropic displacement parameters ( $\text{\AA}^2$ ) for  $\text{K}_3\text{B}_6\text{O}_{10}\text{Br}_{0.53}\text{Cl}_{0.47}$ .  $U_{\text{eq}}$  is defined as one third of the trace of the orthogonalized  $U_{ij}$  tensor.

| Atom | x           | y           | z           | S.O.F    | $U_{\text{eq}}$ |
|------|-------------|-------------|-------------|----------|-----------------|
| Br1  | 0           | 0           | 0.99566(6)  | 0.527(3) | 0.02295(17)     |
| Cl1  | 0           | 0           | 0.99566(6)  | 0.473(3) | 0.02295(17)     |
| K1   | 0.17967(3)  | 0.35934(5)  | 0.88049(4)  | 1        | 0.01770(14)     |
| O1   | 0           | 0           | 0.5491(3)   | 1        | 0.0051(5)       |
| O2   | 0.44461(7)  | 0.55539(7)  | 0.05319(15) | 1        | 0.0112(3)       |
| O3   | 0.23345(10) | 0.23407(10) | 0.62179(12) | 1        | 0.0111(2)       |
| B1   | 0.08727(11) | 0.1745(2)   | 0.5428(2)   | 1        | 0.0067(4)       |
| B2   | 0.3006(2)   | 0.15029(11) | 0.6577(3)   | 1        | 0.0088(4)       |



Table S4. Atomic coordinates and equivalent isotropic displacement parameters ( $\text{\AA}^2$ ) for  $\text{K}_3\text{B}_6\text{O}_{10}\text{Br}_{0.43}\text{Cl}_{0.57}$ .  $U_{\text{eq}}$  is defined as one third of the trace of the orthogonalized  $U_{ij}$  tensor.

| Atom | x           | y           | z            | S.O.F    | $U_{\text{eq}}$ |
|------|-------------|-------------|--------------|----------|-----------------|
| Br1  | 0           | 0           | 0.00377(8)   | 0.430(3) | 0.0235(2)       |
| Cl1  | 0           | 0           | 0.00377(8)   | 0.570(3) | 0.0235(2)       |
| K1   | 0.82048(3)  | 0.64097(6)  | 0.11967(5)   | 1        | 0.01824(16)     |
| O1   | 0           | 0           | 0.4513(3)    | 1        | 0.0059(6)       |
| O2   | 0.55545(8)  | 0.44455(8)  | -0.05319(17) | 1        | 0.0112(3)       |
| O3   | 0.76664(11) | 0.76582(11) | 0.37843(13)  | 1        | 0.0115(2)       |
| B1   | 0.91276(12) | 0.8255(2)   | 0.4576(3)    | 1        | 0.0069(4)       |
| B2   | 0.7002(3)   | 0.85008(13) | 0.3429(3)    | 1        | 0.0089(5)       |

Table S5. Atomic coordinates and equivalent isotropic displacement parameters ( $\text{\AA}^2$ ) for  $\text{K}_3\text{B}_6\text{O}_{10}\text{Br}_{0.25}\text{Cl}_{0.75}$ .  $U_{\text{eq}}$  is defined as one third of the trace of the orthogonalized  $U_{ij}$  tensor.

| Atom | x           | y           | z            | S.O.F    | $U_{\text{eq}}$ |
|------|-------------|-------------|--------------|----------|-----------------|
| Br1  | 0           | 0           | 0.00190(9)   | 0.254(3) | 0.0252(2)       |
| Cl1  | 0           | 0           | 0.00190(9)   | 0.746(3) | 0.0252(2)       |
| K1   | 0.82068(3)  | 0.64137(5)  | 0.11970(4)   | 1        | 0.01845(13)     |
| O1   | 0           | 0           | 0.4503(3)    | 1        | 0.0053(5)       |
| O2   | 0.55572(7)  | 0.44428(7)  | -0.05279(15) | 1        | 0.0112(3)       |
| O3   | 0.76640(10) | 0.76569(9)  | 0.37862(11)  | 1        | 0.0110(2)       |
| B1   | 0.91262(11) | 0.8252(2)   | 0.4576(2)    | 1        | 0.0068(4)       |
| B2   | 0.6998(2)   | 0.84988(11) | 0.3419(2)    | 1        | 0.0088(4)       |

Table S6. Atomic coordinates and equivalent isotropic displacement parameters ( $\text{\AA}^2$ ) for  $\text{K}_3\text{B}_6\text{O}_{10}\text{Cl}$ .  $U_{\text{eq}}$  is defined as one third of the trace of the orthogonalized  $U_{ij}$  tensor.

| Atom | x           | y           | z           | S.O.F | $U_{\text{eq}}$ |
|------|-------------|-------------|-------------|-------|-----------------|
| Cl1  | 0           | 0           | 0.00384(16) | 1     | 0.0281(3)       |
| K1   | 0.17902(3)  | 0.35804(7)  | 0.88208(3)  | 1     | 0.0196(2)       |
| O1   | 0           | 0           | 0.5519(3)   | 1     | 0.0058(6)       |
| O2   | 0.44433(8)  | 0.55567(8)  | 0.05487(19) | 1     | 0.0121(4)       |
| O3   | 0.23350(13) | 0.23429(12) | 0.62309(16) | 1     | 0.0121(3)       |
| B1   | 0.08740(13) | 0.1748(3)   | 0.5444(3)   | 1     | 0.0081(5)       |
| B2   | 0.3004(3)   | 0.15020(16) | 0.6590(3)   | 1     | 0.0089(6)       |

Table S7. The important bond lengths (Å) for  $K_3B_6O_{10}Br_{0.79}Cl_{0.21}$ .

---

|       |            |       |          |
|-------|------------|-------|----------|
| K1-O3 | 2.7808(13) | B1-O2 | 1.448(3) |
| K1-O3 | 2.7809(13) | B1-O3 | 1.463(2) |
| K1-O3 | 2.8047(15) | B1-O3 | 1.463(2) |
| K1-O3 | 2.8047(15) | B1-O1 | 1.527(3) |
| K1-O2 | 2.8464(12) | B2-O3 | 1.361(2) |
| K1-O2 | 2.8464(12) | B2-O3 | 1.361(2) |
| K1-X1 | 3.3077(7)  | B2-O2 | 1.370(3) |
| K1-X1 | 3.3147(8)  |       |          |

---

Table S8. The important bond lengths (Å) for  $K_3B_6O_{10}Br_{0.65}Cl_{0.35}$ .

---

|       |            |       |          |
|-------|------------|-------|----------|
| K1-O3 | 2.7807(15) | B1-O2 | 1.443(4) |
| K1-O3 | 2.7808(15) | B1-O3 | 1.465(2) |
| K1-O3 | 2.8000(16) | B1-O3 | 1.465(2) |
| K1-O3 | 2.8000(16) | B1-O1 | 1.526(3) |
| K1-O2 | 2.8500(13) | B2-O3 | 1.357(2) |
| K1-O2 | 2.8500(13) | B2-O3 | 1.357(2) |
| K1-X1 | 3.3035(8)  | B2-O2 | 1.375(4) |
| K1-X1 | 3.3144(9)  |       |          |

---

Table S9. The important bond lengths (Å) for  $\text{K}_3\text{B}_6\text{O}_{10}\text{Br}_{0.53}\text{Cl}_{0.47}$ .

---

|       |            |       |            |
|-------|------------|-------|------------|
| K1-O3 | 2.7773(9)  | B1-O2 | 1.447(2)   |
| K1-O3 | 2.7773(9)  | B1-O3 | 1.4632(14) |
| K1-O3 | 2.7987(11) | B1-O3 | 1.4632(14) |
| K1-O3 | 2.7987(10) | B1-O1 | 1.527(2)   |
| K1-O2 | 2.8489(8)  | B2-O3 | 1.3596(14) |
| K1-O2 | 2.8489(8)  | B2-O3 | 1.3596(14) |
| K1-X1 | 3.3027(5)  | B2-O2 | 1.370(2)   |
| K1-X1 | 3.3095(6)  |       |            |

---

Table S10. The important bond lengths (Å) for  $K_3B_6O_{10}Br_{0.43}Cl_{0.57}$ .

---

|       |            |       |          |
|-------|------------|-------|----------|
| K1-O3 | 2.7761(10) | B1-O2 | 1.442(3) |
| K1-O3 | 2.7762(10) | B1-O3 | 1.463(2) |
| K1-O3 | 2.7964(12) | B1-O3 | 1.463(2) |
| K1-O3 | 2.7964(12) | B1-O1 | 1.526(2) |
| K1-O2 | 2.8503(10) | B2-O3 | 1.357(2) |
| K1-O2 | 2.8503(10) | B2-O3 | 1.357(2) |
| K1-X1 | 3.3012(6)  | B2-O2 | 1.379(3) |
| K1-X1 | 3.3070(7)  |       |          |

---

Table S11. The important bond lengths (Å) for  $K_3B_6O_{10}Br_{0.25}Cl_{0.75}$ .

---

|       |            |       |            |
|-------|------------|-------|------------|
| K1-O3 | 2.7723(9)  | B1-O2 | 1.445(2)   |
| K1-O3 | 2.7724(9)  | B1-O3 | 1.463(2)   |
| K1-O3 | 2.7969(10) | B1-O3 | 1.463(2)   |
| K1-O3 | 2.7969(10) | B1-O1 | 1.528(2)   |
| K1-O2 | 2.8490(8)  | B2-O3 | 1.3598(13) |
| K1-O2 | 2.8490(8)  | B2-O3 | 1.3598(13) |
| K1-X1 | 3.2994(6)  | B2-O2 | 1.375(2)   |
| K1-X1 | 3.3018(5)  |       |            |

---



Table S12. The important bond lengths (Å) for K<sub>3</sub>B<sub>6</sub>O<sub>10</sub>Cl.

---

|       |            |       |          |
|-------|------------|-------|----------|
| K1-O3 | 2.7697(11) | B1-O2 | 1.444(3) |
| K1-O3 | 2.7697(11) | B1-O3 | 1.460(2) |
| K1-O3 | 2.7948(14) | B1-O3 | 1.460(2) |
| K1-O3 | 2.7948(14) | B1-O1 | 1.527(2) |
| K1-O2 | 2.8518(11) | B2-O3 | 1.358(2) |
| K1-O2 | 2.8518(11) | B2-O3 | 1.358(2) |
| K1-X1 | 3.2815(10) | B2-O2 | 1.376(4) |
| K1-X1 | 3.3051(8)  |       |          |

---
